# Supplementary material for: Transcriptional Stages of Conidia Germination and Associated Genes in Aspergillus flavus: An Essential Role for Redox Genes
Source: MDPI journal article supplement (doi:10.3390/toxins14080560), 2022-08-18
Supplement: s1 [file s1]

## Chong Li, Sifan Jia, Shahid Ali Rajput, Desheng Qi and Shuai Wang

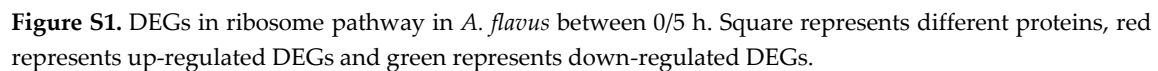

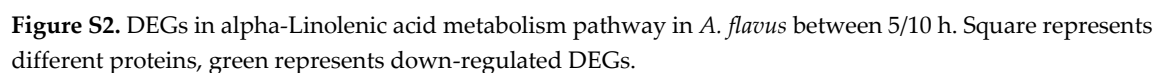

**Figure S2.** DEGs in alpha-Linolenic acid metabolism pathway in *A. flavus* between 5/10 h. Square represents different proteins, green represents down-regulated DEGs.

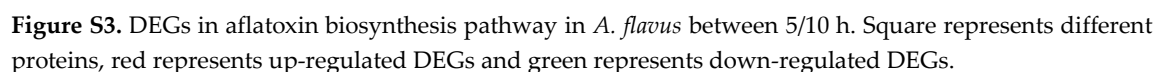

**Figure S3.** DEGs in aflatoxin biosynthesis pathway in *A. flavus* between 5/10 h. Square represents different proteins, red represents up-regulated DEGs and green represents down-regulated DEGs.
